# Supplementary material for: Room temperature triethylamine sensing properties of polyaniline–WO3 nanocomposites with p–n heterojunctions
Source: Royal Society of Chemistry journal article supplement (doi:10.1039/c5ra20843b), 2015-12-24
Supplement: c5ra20843b1.pdf [file c5ra20843b1.pdf]

Supplementary Material (ESI) for RSC Advances  
This journal is (c) The Royal Society of Chemistry 2015

## Supporting Figures

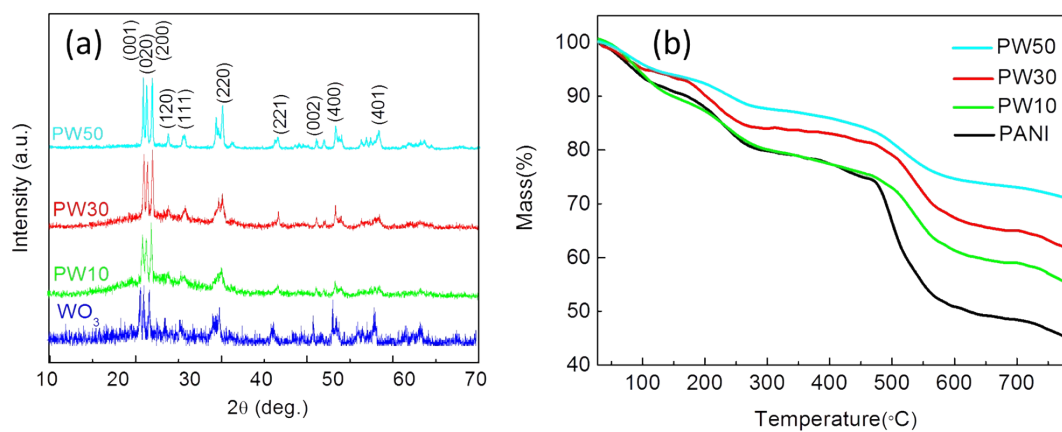

**Fig.S1** (a) XRD patterns of WO<sub>3</sub> and PANI-WO<sub>3</sub> and (b) TGA curves of PANI and PANI-WO<sub>3</sub>.

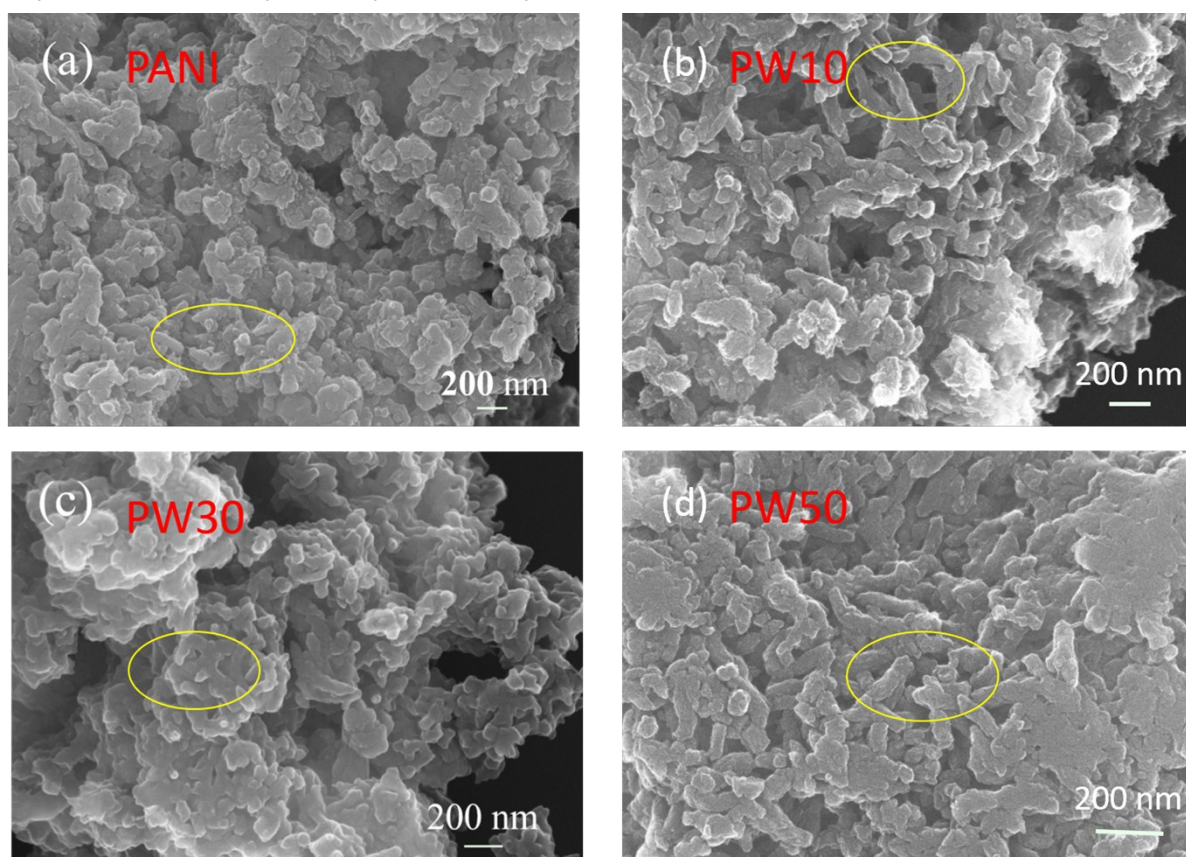

**Fig.S2** FESEM images of (a) PANI, (b) PW10, (c) PW30 and (d) PW50.

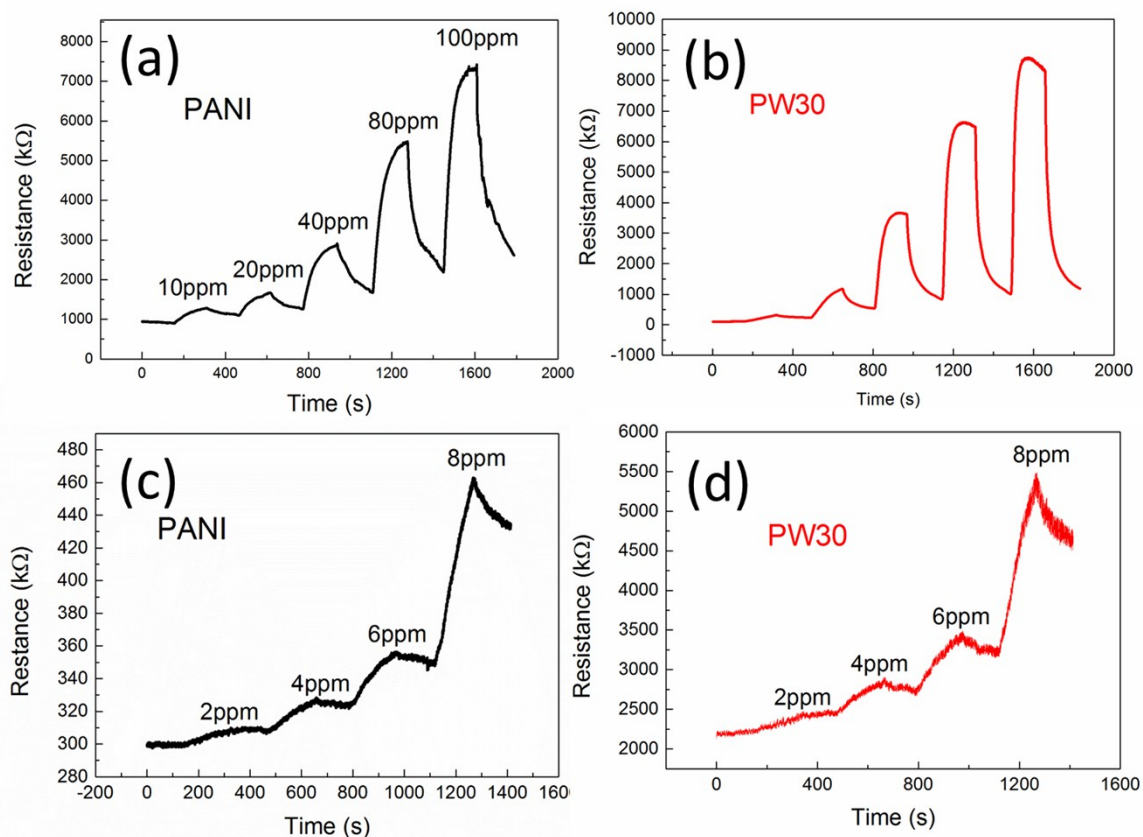

**Fig.S3** Transient resistances of sensors based on (a) PANI, (b) PW30 to 10-100 ppm TEA and (c) PANI, (d) PW30 to 2-8 ppm TEA at room temperature.
